# Supplementary material
Source: Springer Nature journal article supplement (https://www.springermedizin.de/resource/supplementary/12877_2011_753_MOESM3_ESM.pdf/9440252)

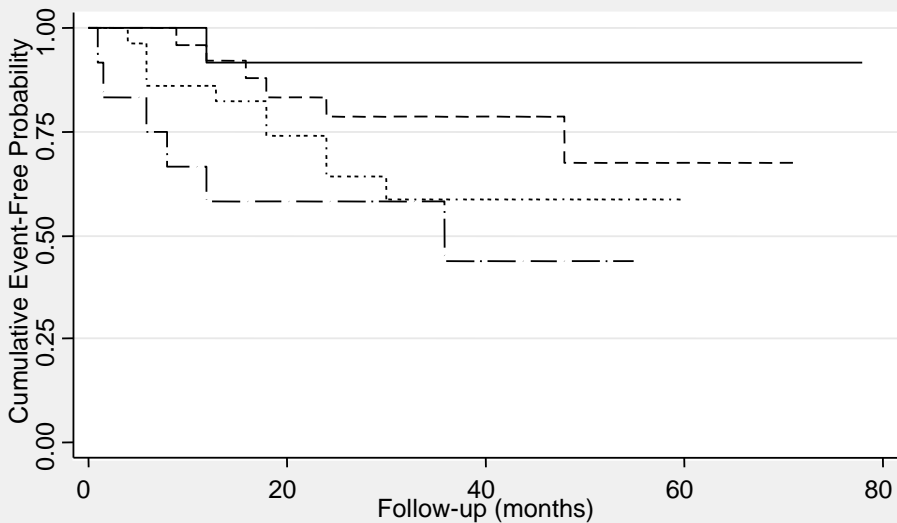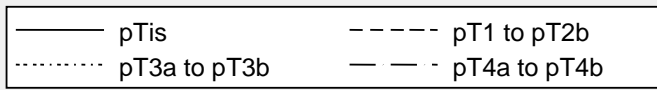

Supplement: MOESM3 [file 9440252]
